# Supplementary material for: New and poorly known Holarctic species of Boletina Staeger, 1840 (Diptera, Mycetophilidae)
Source: Biodivers Data J. 2016 Jan 18;(4):e7218. doi: 10.3897/BDJ.4.e7218 (PMC4759439; doi:10.3897/BDJ.4.e7218)
Supplement: Supplementary material 1 — List of described Boletina species [file biodiversity_data_journal-4-e7218-s001.xls]

## Sheet: Taul1
A list of recent Boletina species by 2015. Comments are Jukka Salmela's personal opinions, and are aimed to promote Boletina taxonomy; these comments should not be used as nomenclatoral acts.
species	PAL	EUR	OR	NEAR	HOL	female only/no figures available/poorly figured	comment	description not seen by Jukka Salmela
Boletina abdita Plassmann, 1980: 209	1	1
Boletina abdominalis Adams, 1903: 24				1		1	holotype male, inadequate original description, should be redescribed
Boletina aculeata Ostroverkhova, 1979: 104	1					1	holotype male, inadequate original description, should be redescribed
Boletina akpatokensis Edwards, 1933: 613				1
Boletina anderschi Stannius, 1831: 20	1	1
Boletina arctica Holmgren, 1872: 105	1	1		1	1		sensu Lundström (1912); B. arctica in Ostroverkhova is most likely B. palmata
Boletina atra Cole, 1921: 219				1		1	holotype male, inadequate original description, should be redescribed
Boletina atridentata Polevoi & Hedmark, 2004: 30	1	1		?	?		Perhaps a junior synonym of B. profectus Fisher, 1937
Boletina attenata Ostroverkhova, 1979: 104	1					1	holotype male, inadequate original description, should be redescribed
Boletina augusta Chandler & Blasco-Zumeta, 2001: 11	1	1
Boletina babai Sasakawa & Kimura, 1974: 56	1
Boletina basalis Meigen, 1818: 257	1	1
Boletina beringensis Coquillett, 1899: 342	1					1	holotype female, should perhaps be nomen nudum
Boletina bidenticulata Sasakawa & Kimura, 1974: 63	1	1
Boletina bifurcata Sasakawa & Kimura, 1974: 55	1
Boletina birulai Lundstrom, 1915: 3	1	1		1	1
Boletina borealis Zetterstedt, 1852: 4160	1	1		1	1
Boletina brevicornis Zetterstedt, 1852: 4163	1	1
Boletina brevirostris Brunetti, 1912: 83			1			1	holotype male, inadequate original description, should be redescribed
Boletina cincticornis Walker, 1848: 102	1	1
Boletina conformis Siebke, 1863: 188	1	1
Boletina conjuncta Sasakawa & Kimura, 1974: 58	1
Boletina cordata Polevoi & Hedmark, 2004: 31	1	1
Boletina cornuta Zaitzev, 1994: 209	1	1				1	male parameres are asymmetrical, should be redescribed
Boletina coronata Ostroverkhova, 1979: 105	1					1	holotype male, inadequate original description, should be redescribed; may not belong to Boletina
Boletina crassicauda Van Duzee, 1928: 44				1		1	holotype male, inadequate original description, should be redescribed
Boletina curta Sasakawa & Kimura, 1974: 60	1
Boletina delicata Johannsen, 1912: 276				1
Boletina dentata Taber, 2013: 120				1
Boletina differens Garrett, 1924: 168				1		1	inadequate original description, holotype male, should be redescribed
Boletina digitata Lundstrom, 1914: 15 (s.str.)	1	1			1	1	a complex of 4 distinct species, three of which are undescribed; B. kijca Maximova, 2001 belongs to the species group around B. digitata; B. digitata s. str. is also known from USA, Michigan (S. Taber pers.comm.)
Boletina dispecta Dziedzicki, 1885: 171	1	1
Boletina dispectoides Jakovlev & Penttinen, 2007: 213	1	1
Boletina dissipata Plassmann, 1987: 146	1	1
Boletina dubia (Meigen, 1804)	1	1
Boletina edwardsi Chandler, 1992: 121	1	1
Boletina falcata Polevoi & Hedmark, 2004: 24	1	1
Boletina fennoscandica Polevoi & Hedmark, 2004: 28	1	1
Boletina flavohirta Brunetti, 1912: 86			1			1	holotype male, inadequate original description, should be redescribed
Boletina fuscula Holmgren, 1883: 190	1					1	holotype female, should perhaps be nomen nudum
Boletina gracilis Johannsen, 1912: 271				1
Boletina gripha Dziedzicki, 1885: 9	1	1
Boletina griphoides Edwards, 1925: 574	1	1
Boletina groenlandica Staeger, 1845: 356	1	1		1	1
Boletina gusakovae Zaitzev, 1994: 214	1	1
Boletina gutianshana Wu & Cheng, 1995: 197			1					1
Boletina hedstroemi Polevoi & Hedmark, 2004: 25	1	1
Boletina hei Wu, 1995: 440			1
Boletina hirtilobula Sasakawa & Kimura, 1974: 58	1
Boletina hopkinsii Coquillett, 1895: 200				1
Boletina hymenophalloides Sasakawa & Kimura, 1974: 51	1
Boletina hyperborea Salmela sp.n.	1	1			1
Boletina ichnusa Chandler, 2009	1	1
Boletina imitator Johannsen, 1912: 271				1
Boletina inops Coquillett, 1900: 391				1		1	syntype series consisting of a male and a female specimens, inadequate original description, should be redescribed
Boletina insulana Zaitzev, Jakovlev & Polevoi, 2006: 247	1
Boletina intermedia Lundstrom, 1915: 4	1	1
Boletina jamalensis Zaitzev, 1994: 214	1	1
Boletina joosti Plassmann, 1987: 146	1	1
Boletina jucunda Garrett, 1924: 167	1					1	holotype male, inadequate original description, should be redescribed; I have seen the holotype in CNC, it is not close to obscura as stated by Garrett (1924)
Boletina katoi Sasakawa & Kimura, 1974: 47	1
Boletina kijca Maximova, 2001: 137	1
Boletina kivachiana Polevoi & Hedmark, 2004: 27	1	1
Boletina kompantzevi Zaitzev, 1994: 216	1
Boletina kopetdagensis Zaitzev, 1994: 216	1
Boletina kowarzi Stackelberg, 1943: 167	1	1
Boletina kullervoi Salmela sp.n.	1	1
Boletina kurilensis Zaitzev, 1994: 217	1	1
Boletina lagena Sasakawa & Kimura, 1974: 49	1
Boletina landrocki Edwards, 1924: 15	1	1
Boletina lapponica Polevoi & Hedmark, 2004: 29	1	1
Boletina lundbecki Lundstrom, 1912: 20	1	1
Boletina lundstromi Landrock, 1912: 30	1	1
Boletina maculata Holmgren, 1869: 49	1	1
Boletina melancholica Johannsen, 1912: 271				1
Boletina meniscophalloides Sasakawa & Kimura, 1974: 61	1
Boletina michigana Taber, 2011: 337				1
Boletina minuta Polevoi, 1995: 186	1	1
Boletina mixta Ostroverkhova, 1979: 105	1					1	holotype male, inadequate original description, should be redescribed
Boletina montana Garrett, 1924: 163				1		1	syntype series consisting of 3 males and 3 females, inadequate original description, should be redescribed
Boletina moravica Landrock, 1912: 29	1	1
Boletina nacta Johannsen, 1912: 277				1		1	syntype series consisting of a male and a female, inadequate original description and later Fisher (1937) merely reproduced Johannsen's figure on the apex of gonostylus; should be redescribed
Boletina nasuta Haliday, 1839: 184	1	1
Boletina nigravena Chandler & Ribeiro, 1995: 39	1	1
Boletina nigricans Dziedzicki, 1885: 174	1	1
Boletina nigricoxa Staeger, 1840: 236	1	1
Boletina nigripes Bukowski, 1934: 183	1	1				1	holotype male, inadequate original description, should be redescribed
Boletina nigrofusca Dziedzicki, 1885: 170	1	1
Boletina nitida Grzegorzek, 1885: 204	1	1
Boletina nitiduloides Zaitzev, 1994: 223	1	1
Boletina notescens Johannsen, 1912: 272				1			B. unusa Garret is perhaps a junior synonym of notescens
Boletina nuortti Salmela sp.n.	1	1
Boletina obesula Johannsen, 1912: 276				1		1	holotype female, should perhaps be nomen nudum
Boletina obscura Johannsen, 1912: 270				1
Boletina onegensis Polevoi, 1995: 192	1	1
Boletina oreadophila Chandler, 1995: 7	1	1
Boletina oviducta Garrett, 1924: 164				1		1	holotype female, should be nomen nudum; perhaps not a Boletina due to wing venation and upturned female ovipositor
Boletina pahangensis Edwards, 1928: 5			1			1	description based on holotype male, figure is provided but is inadequate for identification, generic combination should be re-evaluated
Boletina pallidula Edwards, 1925: 573	1	1	1				B. subnitidula Sasakawa from Japan is a junior synonym of pallidula
Boletina palmata Polevoi, 2013: 119	1	1
Boletina pectinunguis Edwards, 1932: 43	1	1
Boletina pinusia Maximova, 2001: 139	1	1
Boletina plana Walker, 1856: 34	1	1
Boletina polaris Lundstrom, 1915: 4	1	1		1
Boletina populina Polevoi, 1995: 187	1	1
Boletina profectus Shaw & Fisher, 1952: 197				1		1
Boletina prolata Sasakawa & Kimura, 1974: 63	1
Boletina pseudonitida Zaitzev, 1994: 227	1	1
Boletina pseudoventralis Sasakawa & Kimura, 1974: 60	1
Boletina rejecta Edwards, 1941: 70	1	1
Boletina saigusai Matile, 1983: 429			1
Boletina sanxiana Wu, 1997: 1448			1					1
Boletina sciarina Staeger, 1840: 236	1	1		1	1
Boletina sedula Johannsen, 1912: 277				1
Boletina setacea Taber, 2012: 160				1
Boletina shermani Garrett, 1924: 166				1		1	syntype series consisting of 3 males and 7 females, inadequate original description, should be redescribed; I have seen the holotype specimen in CNC, this may be a synonym of B. sedula
Boletina shirozui Saigusa, 1968: 18			1
Boletina sibirica Ostroverkhova, 1970: 108	1					1	holotype male, inadequate original description, should be redescribed; close to B. trivittata
Boletina silvatica Dziedzicki, 1885: 172	1	1
Boletina sobria Johannsen, 1912: 274				1		1	holotype female, should perhaps be nomen nudum
Boletina spathulata Brunetti, 1912: 84			1			1	holotype male, inadequate original description, should be redescribed
Boletina subatra Fisher, 1938: 222				1		1	inadequate original description, holotype male, should be redescribed
Boletina subtriangularis Polevoi & Hedmark, 2004: 30	1	1
Boletina subtrivittata Zaitzev, 1994: 229	1
Boletina takagii Sasakawa & Kimura, 1974: 53	1	1
Boletina takasago Saigusa, 1968: 14			1
Boletina tiroliensis Plassmann, 1980: 211	1	1
Boletina triangularis Polevoi, 1995: 186	1	1
Boletina tricincta Loew, 1869: 143				1		1	gonostylus figured by Johannsen (1912); confusing information provided by Fisher (1937), perhaps some other species depicted in her figures; discussed by Taber (2013), but redescription is needed
Boletina tricinctoides Taber, 2013				1
Boletina trispinosa Edwards, 1913: 364	1	1
Boletina trivittata Meigen, 1818: 258	1	1
Boletina tungusica Ostroverkhova, 1979: 108	1					1	holotype male, inadequate original description, should be redescribed
Boletina unusa Garrett, 1924: 168				1		1	holotype male, inadequate original description, should be redescribed; perhaps a junior synonym of B. notescens
Boletina valteri Salmela sp.n.	1	1
Boletina verticillata Stackelberg, 1943: 167	1	1
Boletina villosa Landrock, 1912: 177	1	1
	99	74	11	34	7	30
PAL=Palaearctic, EUR=European, OR=Oriental, NEAR=Nearctic, HOL=Holarctic
The list of species follows Systema dipterorum (http://www.diptera.org/) and Fungus gnats online (http://sciaroidea.info/)
