# Supplementary material for: New and poorly known Holarctic species of Boletina Staeger, 1840 (Diptera, Mycetophilidae)
Source: Biodivers Data J. 2016 Jan 18;(4):e7218. doi: 10.3897/BDJ.4.e7218 (PMC4759439; doi:10.3897/BDJ.4.e7218)
Supplement: Supplementary material 2 — Ecology of Boletina species, larval records or rearings [file biodiversity_data_journal-4-e7218-s002.xls]

## Sheet: Taul1
ecological information
Boletina species	substrate	reference
basalis	rotting wood and soil litter	Jakovlev et al. 1994, Irmler et al., 1996, Økland 1999
dubia	liverworts	Cheetham 1920
edwardsi	pine log	Jakovlev 2011
gripha	spruce stump, spruce log,	Jakovlev 2011
gripha	pine, soil in pine forest, Suillus bovinus	Jakovlev et al. 1994, Jakovlev et al. 1995, Kurina 1998
nigricans	rotting wood and soil litter	Jakovlev et al. 1994, Irmler et al., 1996, Økland 1999
nigricans	birch trunk	Jakovlev 2011
nigricoxa	soil litter	Plassmann 1971
nigricoxa	fallen leaves of Alnus glutinosa	Jakovlev 2011
populina	damp spruce log	Jakovlev 2011
trispinosa	rotting wood	Schiegg 1999
trivittata	rotting wood and soil litter	Jakovlev et al. 1994, Irmler et al., 1996, Økland 1999
Cheetham CA (1920) A liverwort-eating larva. Naturalist 190.
Irmler U, Heller K & Warning J (1996) Age and tree species as factors influencing the populations of insects living in dead wood (Coleoptera, Diptera: Sciaridae, Mycetophilidae). Pedobiologia 40: 134–148.
Jakovlev EB, Polevoi AV & Humala AE (1994) Insects reared from soil samples in Vaccinium pine stand. In: Zjabchenko SS & Fedorets NG (eds.), Structural and functional organisation of forest soils in mid-taiga subzone of Karelia. Karelian Research Center of the Russian Academy of Science, Petrozavodsk. Pp. 128–145. [In Russian]
Kurina O (1998) Fungus gnats in Estonia (Diptera: Bolitophilidae, Keroplatidae, Macroceridae, Ditomyiidae, Diadocidiidae, Mycetophilidae). Dissertationes Biologicae Universitatis Tartuensis. Vol.38. Tartu University Press. 107 p.
Økland B (1999) New rearing records of forest-dwelling Diptera. An International Journal of Dipterological Research 10: 133–146.
Plassmann E (1971) Über die Fungivoriden Fauna (Diptera) des Naturparkes Hoher Vogelsberg. Oberhessische Naturwissenschaftliche Zeittschrift 38: 53–87.
Schiegg K (1999) Limiting factors of saproxylic insects: habitat relationships of an endangered ecological group. PhD thesis, Swiss Federal Institute of Technology, Zürich. 84 pp.
